# Supplementary material for: Induced oligomerization targets Golgi proteins for degradation in lysosomes
Source: PubMed Central journal article supplement — Mol Biol Cell. 2015 Dec 1;26(24):4427–37. doi: 10.1091/mbc.E15-04-0207 (PMC4666137; doi:10.1091/mbc.e15-04-0207), 2015-12-01
Supplement: supp_E15-04-0207v1_CombinedSupMats.pdf [file supp_E15-04-0207v1_CombinedSupMats.pdf]

# Supplemental Materials

*Molecular Biology of the Cell*

Tewari et al.

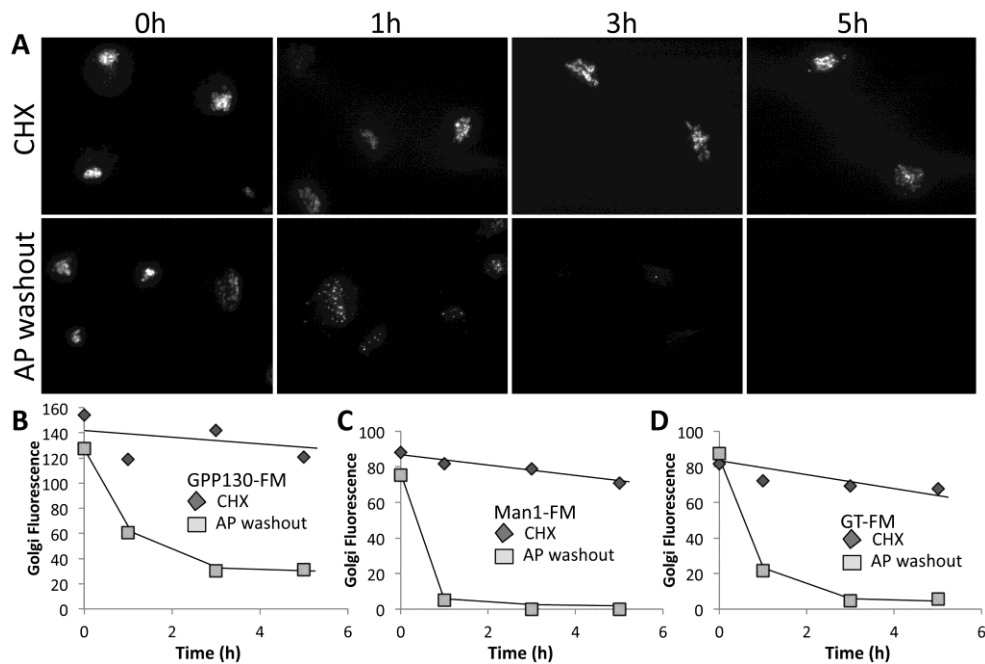

**Supplemental Figure S1. Stability of transfected FM constructs in the Golgi (A)**

The GFP-fluorescence pattern is shown for cells expressing GT-FM that were treated with cycloheximide for indicated times in either the continued presence of AP (top row) or after AP washout (bottom row). Note that GT-FM was stable in cycloheximide unless AP was removed. The cells in this experiment were also co-stained with anti-giantin antibodies yielding staining that marked the Golgi and remained unchanged under all conditions (not shown). (B-D) Golgi fluorescence was quantified for the indicated constructs at times of cycloheximide treatment with and without AP washout (average is shown, >10 cells/data point).
